# Supplementary material
Source: ML conference proceedings conference paper supplement (https://openreview.net/forum?id=TCGUnoiaWP)
Supplement: supplementary_material [file attachment]

## A APPENDIX

### A.1 MORE VISUALIZATIONS OF HUMAN INTERACTIONS

We show visualization results on human interactions. Fig. 5 demonstrates that our pipeline can generate well-aligned image-annotation pairs where people are with close interactions. The generated data pairs are of great value in enhancing existing human interaction datasets collected in the studio environment. (e.g., Hi4D [Yin et al. \(2023\)](#) and CHI3D [Fieraru et al. \(2020\)](#))

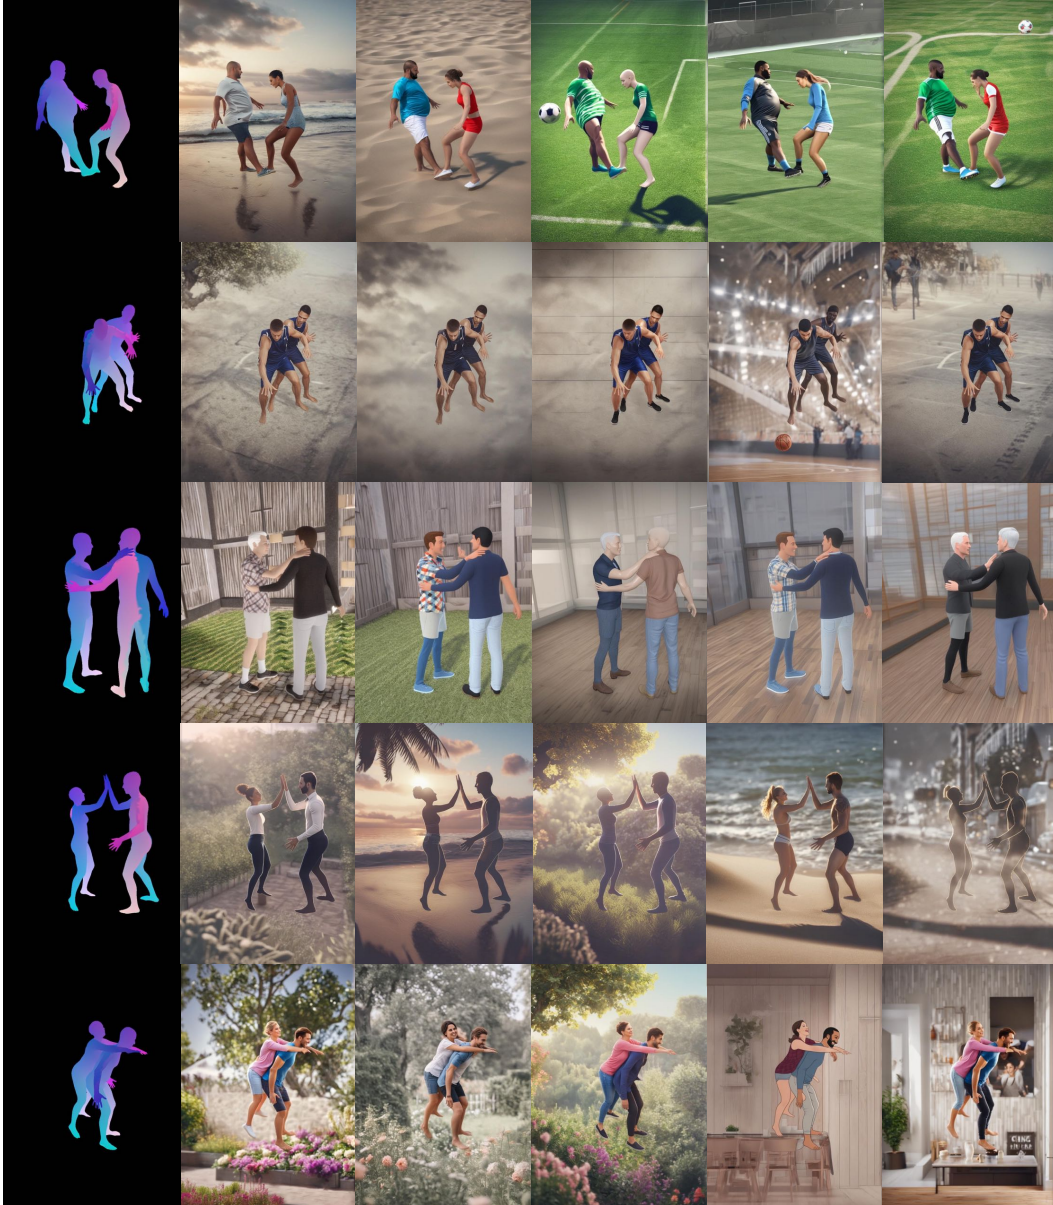

Figure 5: Visualization of Human interaction. The SMPL interaction annotations are sampled from the Hi4D [Yin et al. \(2023\)](#) dataset.

## A.2 FAILURE CASES OF THE INITIAL TRAINING PAIRS

In Fig. 6, we show some failure cases of the initial data pairs generated by ControlNet. The inconsistency of the image and 3D mesh would affect the performance of the 3D human pose estimation. Thus, it is necessary to conduct the label refinement proposed in this work.

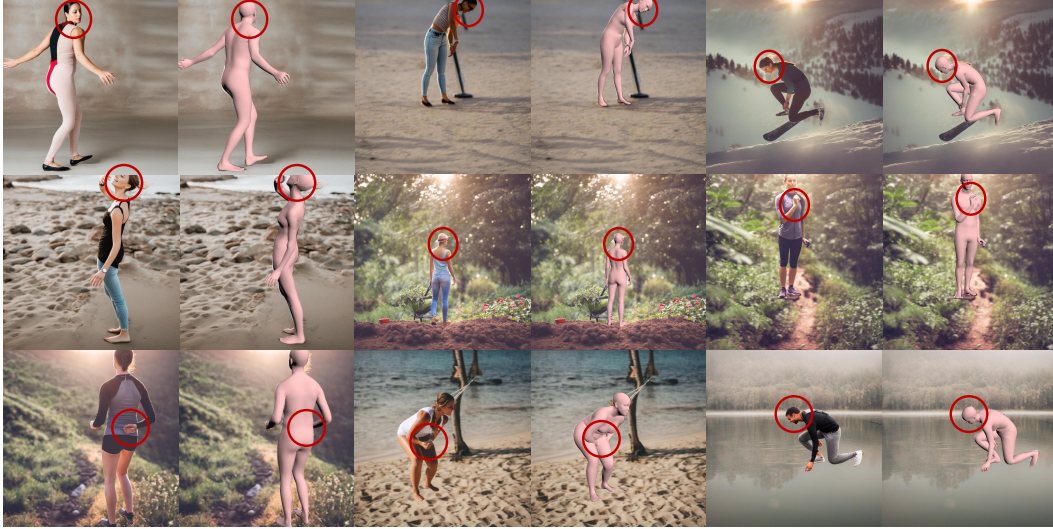

Figure 6: Failure cases of the initial data pairs generated by ControlNet. Highlight with red circles.

## A.3 TEXT PROMPT EXAMPLES GENERATED BY LLM

In Appendix A.3, we show some text prompt examples, which are generated by ChatGPT (OpenAI 2023) with diverse human actions and scenes.

| gender  | action         | environment     |
|---------|----------------|-----------------|
| a man   | playing soccer | at the park     |
| a woman | reading a book | on the beach    |
| a woman | dancing        | at a nightclub  |
| a man   | eating dinner  | at a restaurant |
| a woman | walking        | in the city     |
| a woman | swimming       | in the pool     |
| a man   | shopping       | at the mall     |
| a woman | running        | in the park     |
| a man   | studying       | at the library  |
| a man   | working        | at the office   |
| a man   | chatting       | at a cafe       |

Table 6: Text prompt examples.
